# Supplementary material for: Role of Combination Antiplatelet and Anticoagulation Therapy in Diabetes Mellitus and Cardiovascular Disease: Insights From the COMPASS Trial
Source: PubMed Central journal article supplement — Circulation. 2020 Mar 28;141(23):1841–54. doi: 10.1161/CIRCULATIONAHA.120.046448 (PMC7314494; doi:10.1161/circulationaha.120.046448), 2020-03-28
Supplement: cir-141-1841-s001.pdf [file cir-141-1841-s001.pdf]

## **SUPPLEMENTAL MATERIAL**

The Role of Combination Antiplatelet and Anticoagulation Therapy in Diabetes and Cardiovascular Disease: Insights from the COMPASS Trial

Deepak L. Bhatt MD, MPH, John W. Eikelboom MBBS, Stuart J. Connolly MD, Ph. Gabriel Steg MD, Sonia S. Anand MD, Subodh Verma MD, PhD, Kelley R. H. Branch MD, Jeffrey Probstfield MD, Jackie Bosch PhD, Olga Shestakovska MSc, Michael Szarek, Ph.D., Aldo Pietro Maggioni MD, Petr Widimský MD, Alvaro Avezum MD, Rafael Diaz MD, Basil S. Lewis MD, Scott D. Berkowitz MD, Keith A. A. Fox MBChB, Lars Ryden MD, Salim Yusuf DPhil, on Behalf of the COMPASS Steering Committee and Investigators\*

\* Steering Committee: S. Yusuf, KAA. Fox, S. Connolly, JW. Eikelboom, J. Bosch, V. Aboyans, M. Alings, S. Anand, A. Avezum, D.L. Bhatt, K. Branch, P. Commerford, N. Cook-Bruns, G. Dagenais, A. Dans, R. Diaz, G. Ertl, C. Felix, , T. Guzik, R. Hart, M. Hori, A. Kakkar, K. Keltai, M. Keltai, J. Kim, A. Lamy, F. Lanas, B. Lewis, Y. Liang, L. Liu, E. Lonn, P. Lopez-Jaramillo, A. Maggioni, K. Metsarinne, P. Moayyedi, M. O'Donnell, A. Parkhomenko, L. Piegas, N. Pogossova, J. Probstfield, L. Ryden, M. Sharma, P.G. Steg, S. Stoerk, A. Tonkin, C. TorpPedersen, J. Varigos, P. Verhamme, D. Vinereanu, P. Widimsky, K. Yusoff, J. Zhu.

**Suppl. Table 1. Baseline characteristics of patients with and without diabetes at baseline in the entire trial.**

|                                                    | <b>No Diabetes<br/>(N=17,054)</b> | <b>Diabetes<br/>(N=10,341)</b> | <b>P value</b> |
|----------------------------------------------------|-----------------------------------|--------------------------------|----------------|
| Age (year)                                         | 69.0±7.7                          | 67.0±8.2                       | <0.0001        |
| Female                                             | 3492 (20.5)                       | 2528 (24.4)                    | <0.0001        |
| Body mass index (kg/m <sup>2</sup> )               | 27.7±4.3                          | 29.3±5.2                       | <0.0001        |
| Systolic blood pressure (mm Hg)                    | 135±18                            | 136±18                         | <0.0001        |
| Diastolic blood pressure (mm Hg)                   | 78±10                             | 77±10                          | <0.0001        |
| Total cholesterol (mmol/l)                         | 4.2±1.0                           | 4.1±1.1                        | <0.0001        |
| Tobacco use                                        |                                   |                                |                |
| Never                                              | 5457 (32.0)                       | 3300 (31.9)                    | 0.88           |
| Former                                             | 8148 (47.8)                       | 4623 (44.7)                    | <0.0001        |
| Current                                            | 3449 (20.2)                       | 2418 (23.4)                    | <0.0001        |
| Hypertension                                       | 12108 (71.0)                      | 8524 (82.4)                    | <0.0001        |
| Previous stroke                                    | 514 (3.0)                         | 518 (5.0)                      | <0.0001        |
| Previous myocardial infarction                     | 10838 (63.6)                      | 6190 (59.9)                    | <0.0001        |
| Heart failure                                      | 3476 (20.4)                       | 2426 (23.5)                    | <0.0001        |
| Coronary artery disease                            | 15726 (92.2)                      | 9098 (88.0)                    | <0.0001        |
| Peripheral artery disease                          | 4183 (24.5)                       | 3287 (31.8)                    | <0.0001        |
| Estimated GFR                                      |                                   |                                |                |
| <30 ml/min                                         | 95 (0.6)                          | 148 (1.4)                      | <0.0001        |
| 30 to <60 ml/min                                   | 3600 (21.1)                       | 2433 (23.5)                    | <0.0001        |
| ≥60 ml/min                                         | 13354 (78.3)                      | 7757 (75.0)                    | <0.0001        |
| Race                                               |                                   |                                |                |
| White                                              | 11508 (67.5)                      | 5519 (53.4)                    | <0.0001        |
| Black                                              | 114 (0.7)                         | 148 (1.4)                      | <0.0001        |
| Asian                                              | 2217 (13.0)                       | 2052 (19.8)                    | <0.0001        |
| Other                                              | 3215 (18.9)                       | 2622 (25.4)                    | <0.0001        |
| Geographic region                                  |                                   |                                |                |
| North America                                      | 2441 (14.3)                       | 1477 (14.3)                    | 0.94           |
| South America                                      | 3438 (20.2)                       | 2706 (26.2)                    | <0.0001        |
| Western Europe, Israel, Australia, or South Africa | 6058 (35.5)                       | 2497 (24.1)                    | <0.0001        |
| Eastern Europe                                     | 3058 (17.9)                       | 1765 (17.1)                    | 0.07           |
| Asia-Pacific                                       | 2059 (12.1)                       | 1896 (18.3)                    | <0.0001        |
| Medication                                         |                                   |                                |                |
| ACE inhibitor or ARB                               | 11826 (69.3)                      | 7692 (74.4)                    | <0.0001        |
| Calcium-channel blocker                            | 4136 (24.3)                       | 3133 (30.3)                    | <0.0001        |
| Diuretic                                           | 4499 (26.4)                       | 3640 (35.2)                    | <0.0001        |
| Beta blocker                                       | 11883 (69.7)                      | 7301 (70.6)                    | 0.11           |
| Lipid-lowering agent                               | 15484 (90.8)                      | 9117 (88.2)                    | <0.0001        |
| NSAID                                              | 852 (5.0)                         | 618 (6.0)                      | 0.0005         |
| Hypoglycemic agent                                 | 52 (0.3)                          | 8503 (82.2)                    | <0.0001        |
| Non-trial PPI                                      | 6167 (36.2)                       | 3631 (35.1)                    | 0.08           |

For continuous variables, plus-minus values are mean ± standard deviation. For categorical variables, frequency (percent) are shown.

P value is from the Wilcoxon 2-sample test for continuous variables, and Pearson chi-square test for categorical variables. GFR = glomerular filtration rate. ACE = angiotensin converting enzyme. ARB = angiotensin receptor blocker. NSAID = non-steroidal anti-inflammatory drug. PPI = proton pump inhibitor.

**Suppl. Table 2. Baseline characteristics of patients with diabetes randomized to rivaroxaban plus aspirin or placebo plus aspirin.**

|                                                    | <b>Rivaroxaban plus Aspirin<br/>(N=3,448)</b> | <b>Placebo plus Aspirin<br/>(N=3,474)</b> | <b>P value</b> |
|----------------------------------------------------|-----------------------------------------------|-------------------------------------------|----------------|
| Age (year)                                         | 66.9±8.3                                      | 67.0±8.2                                  | 0.84           |
| Female                                             | 832 (24.1)                                    | 846 (24.4)                                | 0.83           |
| Body mass index (kg/m <sup>2</sup> )               | 29.3±5.3                                      | 29.4±5.2                                  | 0.21           |
| Systolic blood pressure (mm Hg)                    | 136±17                                        | 136±17                                    | 0.57           |
| Diastolic blood pressure (mm Hg)                   | 77±10                                         | 77±10                                     | 0.99           |
| Total cholesterol (mmol/l)                         | 4.1±1.1                                       | 4.2±1.1                                   | 0.40           |
| Tobacco use                                        |                                               |                                           |                |
| Never                                              | 1084 (31.4)                                   | 1139 (32.8)                               | 0.23           |
| Former                                             | 1559 (45.2)                                   | 1522 (43.8)                               | 0.24           |
| Current                                            | 805 (23.3)                                    | 813 (23.4)                                | 0.96           |
| Hypertension                                       | 2838 (82.3)                                   | 2857 (82.2)                               | 0.94           |
| Previous stroke                                    | 181 (5.2)                                     | 162 (4.7)                                 | 0.26           |
| Previous myocardial infarction                     | 2055 (59.6)                                   | 2100 (60.4)                               | 0.47           |
| Heart failure                                      | 780 (22.6)                                    | 834 (24.0)                                | 0.17           |
| Coronary artery disease                            | 3043 (88.3)                                   | 3040 (87.5)                               | 0.34           |
| Peripheral artery disease                          | 1100 (31.9)                                   | 1104 (31.8)                               | 0.91           |
| Estimated GFR                                      |                                               |                                           |                |
| <30 ml/min                                         | 50 (1.5)                                      | 49 (1.4)                                  | 0.89           |
| 30 to <60 ml/min                                   | 791 (22.9)                                    | 857 (24.7)                                | 0.09           |
| ≥60 ml/min                                         | 2606 (75.6)                                   | 2568 (73.9)                               | 0.11           |
| Race                                               |                                               |                                           |                |
| White                                              | 1830 (53.1)                                   | 1878 (54.1)                               | 0.41           |
| Black                                              | 48 (1.4)                                      | 52 (1.5)                                  | 0.72           |
| Asian                                              | 681 (19.8)                                    | 660 (19.0)                                | 0.43           |
| Other                                              | 889 (25.8)                                    | 884 (25.4)                                | 0.75           |
| Geographic region                                  |                                               |                                           |                |
| North America                                      | 495 (14.4)                                    | 502 (14.5)                                | 0.91           |
| South America                                      | 915 (26.5)                                    | 919 (26.5)                                | 0.94           |
| Western Europe, Israel, Australia, or South Africa | 828 (24.0)                                    | 845 (24.3)                                | 0.76           |
| Eastern Europe                                     | 587 (17.0)                                    | 592 (17.0)                                | 0.99           |
| Asia-Pacific                                       | 623 (18.1)                                    | 616 (17.7)                                | 0.71           |
| Medication                                         |                                               |                                           |                |
| ACE inhibitor or ARB                               | 2532 (73.4)                                   | 2569 (73.9)                               | 0.63           |
| Calcium-channel blocker                            | 1059 (30.7)                                   | 1036 (29.8)                               | 0.42           |
| Diuretic                                           | 1209 (35.1)                                   | 1254 (36.1)                               | 0.37           |
| Beta blocker                                       | 2416 (70.1)                                   | 2450 (70.5)                               | 0.68           |
| Lipid-lowering agent                               | 3028 (87.8)                                   | 3047 (87.7)                               | 0.89           |
| NSAID                                              | 223 (6.5)                                     | 203 (5.8)                                 | 0.28           |
| Hypoglycemic agent                                 | 2820 (81.8)                                   | 2871 (82.6)                               | 0.35           |
| Non-trial PPI                                      | 1209 (35.1)                                   | 1203 (34.6)                               | 0.70           |

For continuous variables, plus-minus values are mean ± standard deviation. For categorical variables, frequency (percent) are shown.

P value is from the Wilcoxon 2-sample test for continuous variables, and Pearson chi-square test for categorical variables. GFR = glomerular filtration rate. ACE = angiotensin converting enzyme. ARB = angiotensin receptor blocker. NSAID = non-steroidal anti-inflammatory drug. PPI = proton pump inhibitor.

**Suppl. Table 3. Baseline characteristics of patients without diabetes randomized to rivaroxaban plus aspirin or placebo plus aspirin.**

|                                                    | <b>Rivaroxaban plus<br/>Aspirin<br/>(N=5,704)</b> | <b>Placebo plus<br/>Aspirin<br/>(N=5,652)</b> | <b>P value</b> |
|----------------------------------------------------|---------------------------------------------------|-----------------------------------------------|----------------|
| Age (year)                                         | 69.1±7.6                                          | 69.0±7.8                                      | 0.84           |
| Female                                             | 1227 (21.5)                                       | 1143 (20.2)                                   | 0.09           |
| Body mass index (kg/m <sup>2</sup> )               | 27.7±4.3                                          | 27.8±4.3                                      | 0.96           |
| Systolic blood pressure (mm Hg)                    | 135±17                                            | 135±18                                        | 0.93           |
| Diastolic blood pressure (mm Hg)                   | 78±10                                             | 78±10                                         | 0.13           |
| Total cholesterol (mmol/l)                         | 4.2±1.0                                           | 4.2±1.0                                       | 0.72           |
| Tobacco use                                        |                                                   |                                               |                |
| Never                                              | 1838 (32.2)                                       | 1764 (31.2)                                   | 0.25           |
| Former                                             | 2727 (47.8)                                       | 2729 (48.3)                                   | 0.61           |
| Current                                            | 1139 (20.0)                                       | 1159 (20.5)                                   | 0.48           |
| Hypertension                                       | 4069 (71.3)                                       | 4020 (71.1)                                   | 0.80           |
| Previous stroke                                    | 170 (3.0)                                         | 173 (3.1)                                     | 0.80           |
| Previous myocardial infarction                     | 3599 (63.1)                                       | 3621 (64.1)                                   | 0.28           |
| Heart failure                                      | 1183 (20.7)                                       | 1145 (20.3)                                   | 0.53           |
| Coronary artery disease                            | 5270 (92.4)                                       | 5221 (92.4)                                   | 0.97           |
| Peripheral artery disease                          | 1392 (24.4)                                       | 1400 (24.8)                                   | 0.65           |
| Estimated GFR                                      |                                                   |                                               |                |
| <30 ml/min                                         | 27 (0.5)                                          | 37 (0.7)                                      | 0.20           |
| 30 to <60 ml/min                                   | 1186 (20.8)                                       | 1171 (20.7)                                   | 0.91           |
| ≥60 ml/min                                         | 4488 (78.7)                                       | 4444 (78.6)                                   | 0.90           |
| Race                                               |                                                   |                                               |                |
| White                                              | 3843 (67.4)                                       | 3804 (67.3)                                   | 0.94           |
| Black                                              | 28 (0.5)                                          | 40 (0.7)                                      | 0.13           |
| Asian                                              | 770 (13.5)                                        | 737 (13.0)                                    | 0.47           |
| Other                                              | 1063 (18.6)                                       | 1071 (18.9)                                   | 0.67           |
| Geographic region                                  |                                                   |                                               |                |
| North America                                      | 809 (14.2)                                        | 807 (14.3)                                    | 0.88           |
| South America                                      | 1139 (20.0)                                       | 1135 (20.1)                                   | 0.88           |
| Western Europe, Israel, Australia, or South Africa | 2027 (35.5)                                       | 2010 (35.6)                                   | 0.98           |
| Eastern Europe                                     | 1020 (17.9)                                       | 1012 (17.9)                                   | 0.97           |
| Asia-Pacific                                       | 709 (12.4)                                        | 688 (12.2)                                    | 0.68           |
| Medication                                         |                                                   |                                               |                |
| ACE inhibitor or ARB                               | 3943 (69.1)                                       | 3893 (68.9)                                   | 0.77           |
| Calcium-channel blocker                            | 1354 (23.7)                                       | 1446 (25.6)                                   | 0.02           |
| Diuretic                                           | 1518 (26.6)                                       | 1492 (26.4)                                   | 0.80           |
| Beta blocker                                       | 3973 (69.7)                                       | 3944 (69.8)                                   | 0.88           |
| Lipid-lowering agent                               | 5211 (91.4)                                       | 5111 (90.4)                                   | 0.09           |
| NSAID                                              | 308 (5.4)                                         | 270 (4.8)                                     | 0.13           |
| Hypoglycemic agent                                 | 20 (0.4)                                          | 15 (0.3)                                      | 0.41           |
| Non-trial PPI                                      | 2059 (36.1)                                       | 2061 (36.5)                                   | 0.68           |

For continuous variables, plus-minus values are mean ± standard deviation. For categorical variables, frequency (percent) are shown.

P value is from the Wilcoxon 2-sample test for continuous variables, and Pearson chi-square test for categorical variables. GFR = glomerular filtration rate. ACE = angiotensin converting enzyme. ARB = angiotensin receptor blocker. NSAID = non-steroidal anti-inflammatory drug. PPI = proton pump inhibitor.

**Suppl. Table 4. Outcomes in patients with diabetes by subgroups of PPI use at baseline for rivaroxaban plus aspirin versus placebo plus aspirin.**

|                                                                                                                         | Rivaroxaban plus Aspirin<br>(N=3448)        |                                          | Placebo plus Aspirin<br>(N=3474)            |                                          | Rivaroxaban plus Aspirin vs.<br>Placebo plus Aspirin |            |                                |
|-------------------------------------------------------------------------------------------------------------------------|---------------------------------------------|------------------------------------------|---------------------------------------------|------------------------------------------|------------------------------------------------------|------------|--------------------------------|
|                                                                                                                         | No. of<br>first events /<br>patients<br>(%) | Kaplan-<br>Meier risk<br>at 36<br>months | No. of<br>first events /<br>patients<br>(%) | Kaplan-<br>Meier risk<br>at 36<br>months | Hazard Ratio<br>(95% CI)                             | P<br>value | P value<br>for<br>interaction* |
| <b>Cardiovascular death, stroke, or myocardial infarction</b>                                                           |                                             |                                          |                                             |                                          |                                                      |            |                                |
| PPI use at baseline                                                                                                     |                                             |                                          |                                             |                                          |                                                      |            | 0.32                           |
| Pantoprazole active                                                                                                     | 67 / 1116 (6.0)                             | 8.6                                      | 74 / 1132 (6.5)                             | 9.6                                      | 0.91 (0.65-1.27)                                     | 0.58       |                                |
| Pantoprazole placebo                                                                                                    | 56 / 1124 (5.0)                             | 9.9                                      | 85 / 1144 (7.4)                             | 13.1                                     | 0.65 (0.46-0.91)                                     | 0.01       |                                |
| Not randomized to PPI                                                                                                   | 56 / 1208 (4.6)                             | 7.1                                      | 80 / 1198 (6.7)                             | 9.7                                      | 0.68 (0.48-0.96)                                     | 0.03       |                                |
| <b>Major bleeding</b>                                                                                                   |                                             |                                          |                                             |                                          |                                                      |            |                                |
| PPI use at baseline                                                                                                     |                                             |                                          |                                             |                                          |                                                      |            | 0.88                           |
| Pantoprazole active                                                                                                     | 32 / 1116 (2.9)                             | 4.1                                      | 18 / 1132 (1.6)                             | 2.4                                      | 1.81 (1.02-3.23)                                     | 0.04       |                                |
| Pantoprazole placebo                                                                                                    | 36 / 1124 (3.2)                             | 4.6                                      | 20 / 1144 (1.7)                             | 4.5                                      | 1.82 (1.05-3.14)                                     | 0.03       |                                |
| Not randomized to PPI                                                                                                   | 42 / 1208 (3.5)                             | 4.7                                      | 27 / 1198 (2.3)                             | 3.6                                      | 1.55 (0.95-2.51)                                     | 0.07       |                                |
| <b>Cardiovascular death, stroke, myocardial infarction, fatal bleeding, or symptomatic bleeding into critical organ</b> |                                             |                                          |                                             |                                          |                                                      |            |                                |
| PPI use at baseline                                                                                                     |                                             |                                          |                                             |                                          |                                                      |            | 0.12                           |
| Pantoprazole active                                                                                                     | 78 / 1116 (7.0)                             | 9.7                                      | 78 / 1132 (6.9)                             | 10.0                                     | 1.01 (0.74-1.39)                                     | 0.93       |                                |
| Pantoprazole placebo                                                                                                    | 58 / 1124 (5.2)                             | 9.9                                      | 90 / 1144 (7.9)                             | 13.7                                     | 0.64 (0.46-0.89)                                     | 0.007      |                                |
| Not randomized to PPI                                                                                                   | 68 / 1208 (5.6)                             | 8.2                                      | 90 / 1198 (7.5)                             | 11.7                                     | 0.74 (0.54-1.01)                                     | 0.06       |                                |

Percent (%) is the proportion of patients with an outcome.

Hazard ratios (95% CI) are from the stratified Cox proportional hazards regression models fit in the respective subgroup.

P values are from the stratified log-rank test.

\*Test of interaction of relative risk reduction (Cox regression).
